# Supplementary material for: Using the Normalization Process Theory to qualitatively explore sense-making in implementation of the Enhanced Recovery After Surgery programme: "It's not rocket science"
Source: PubMed Central journal article supplement (PMC5906013; doi:10.1371/journal.pone.0195890), 2018-04-18
Supplement: pone.0195890.s002.pdf [file pone.0195890.s002.pdf]

## Interview guide

1. Could you tell me a little about your job role?  
*(Prompt: for position classification (banding/medical grade), length of service in clinical area)*
2. Why did your ward/hospital decide to implement ERAS?  
*(Prompt: How did you hear about ERAS?)*
3. How was ERAS set-up in your area?  
*(Prompt: Who would you say leads the implementation of ERAS, coordinates the activities, makes the decisions? Who else is part of implementing ERAS?)*
4. What is your understanding of ERAS?
5. For you, what are the main components of ERAS?  
*(Prompt about nutritional elements [fluid and carbohydrate loading, no prolonged fasting, early oral nutrition, stimulation of gut motility, prevention of nausea and vomiting] and whether they feel they are as important as the other components)*
6. How does ERAS fit with your current work practices on a day to day basis?  
*(Prompt: how nutritional elements specifically fit.)*
7. Have you had any training with regards to ERAS?  
*(Prompt: What training? What did they think of the training?)*
8. Do you have a protocol or certain procedures that you follow?  
*(Prompt: What are the protocols/procedures they follow?)*
9. Describe your role in carrying out ERAS with patients/staff?
10. Do you feel equipped to carry out your role within ERAS?  
*(Prompt: Does their role depend on the work of others to carry out ERAS?)*

11. How would you describe your level of commitment to ERAS?  
*(Prompt: Explore why they have that level of commitment)*
12. Are there any factors that facilitate following the ERAS protocol or programme?  
*(Prompt: What are the things that help?)*
13. Are there any barriers or challenges to following the ERAS protocol or programme?  
*(Prompt: What are these barriers/challenges? What has been the most challenging thing about implementing and carrying out ERAS? Have you adopted any strategies to overcome any of these?)*
14. Do any other programmes impact on following the ERAS protocol in your area?  
*(Prompt: What are these programmes and how do they impact?)*
15. Is there anything about the patients you treat that effects doing ERAS?
16. How do you evaluate the ERAS programme both on your own and as a team?  
*(Prompt: depending upon position classification - Are you involved in any monitoring of how ERAS is going?)*
17. Has your delivery of the programme changed over time?  
*(Prompt: What prompted this change? What have been the effects of any adaptations?)*
18. How sustainable do you think the ERAS activities are in the long term?
19. Is there anything that you would like to mention that you don't think we've covered?

*Thank for time and close interview.*
